# Gene discovery and functional assessment of rare copy-number variants in neurodevelopmental disorders

Janani Iyer and Santhosh Girirajan

**Corresponding author:** Santhosh Girirajan, 205A Life Sciences Building, Departments of Biochemistry and Molecular Biology and Anthropology, The Pennsylvania State University, University Park, PA 16802, Tel: 814-865-0674, E-mail: [sxg47@psu.edu](mailto:sxg47@psu.edu),

Word count: 4,608

## AUTHOR BIOGRAPHY

Janani Iyer is a postdoctoral fellow in the laboratory of Santhosh Girirajan at The Pennsylvania State University. She is studying the role of dosage sensitive genes within rare CNVs using *Drosophila melanogaster*.

Santhosh Girirajan is an Assistant Professor of Biochemistry and Molecular Biology and Anthropology at The Pennsylvania State University. His laboratory is studying the molecular genetic basis of neurodevelopmental disorders by combining work on the discovery of genetic variants in affected children with functional characterization using model organisms.

## ABSTRACT

Rare copy-number variants (CNVs) are a significant cause of neurodevelopmental disorders. The sequence architecture of the human genome predisposes certain individuals to deletions and duplications within specific genomic regions. While assessment of individuals with different breakpoints has identified causal genes for certain rare CNVs, deriving gene-phenotype correlations for rare CNVs with similar breakpoints has been challenging. We present a comprehensive review of the literature related to genetic architecture that is predisposed to recurrent rearrangements, and functional evaluation of deletions, duplications, and candidate genes within rare CNV intervals using mouse, zebrafish, and fruit fly models. It is clear that phenotypic assessment and complete genetic evaluation of large cohorts of individuals carrying specific CNVs and functional evaluation using multiple animal models are necessary to understand the molecular genetic basis of neurodevelopmental disorders.

**Keywords:** rare CNVs, deletions, duplications, autism, intellectual disability, *Drosophila*, mouse, zebrafish, haploinsufficiency, dosage sensitivity

## KEY POINTS

- Genetic architecture predisposes about 9% of the human genome to disease-causing rare deletions and duplications
- Chromosomal translocations and atypical deletions have enabled the discovery of dosage sensitive genes within rare CNV regions
- Mouse models carrying deletions and duplications for rare CNVs have recapitulated most of the human disease phenotypes and have also aided gene discovery in disorders where there are limitations to human studies
- Zebrafish studies have proven to be excellent tools for high throughput screens and for evaluation of key neuroanatomical phenotypes
- *Drosophila* models have provided deeper insights into the neuronal basis of neurodevelopmental disorders
- Future studies of rare CNVs should consider the limitations of animal models while emphasizing validation across model systems for accurate understanding of the pathophysiology of human disease

## INTRODUCTION

Copy-number variants (CNVs) are a significant source of genetic variation and have an important role in human variation, disease, and evolution [1]. In terms of the number of base pairs, between any two individuals, there is more variation due to CNVs, including deletions and duplications than SNPs [2]. Rare CNVs typically occur at a frequency of <1% to <0.1% in the population [3]. Recent high throughput studies using microarrays and sequencing have provided insights into the structure of the human genome [4]. The following themes have emerged from these studies. First, sequence architecture of the human genome predisposes certain regions to recurrent and non-recurrent rearrangements. Genetic predisposition for recombination-based events is conferred by a specific configuration of repeat sequences facilitated by large inversions. In addition, smaller repeats have also led to non-recurrent rearrangements through errors in recombination and replication. Second, rare CNVs are particularly enriched in individuals with neuropsychiatric and developmental phenotypes and overlapping CNVs with different breakpoints have narrowed down the candidate genes for specific phenotypes. Third, while animal models have been able to recapitulate dosage-sensitive phenotypes for one or more genes within certain CNVs, for others, prioritization of candidate genes has been difficult because of a lack of gene-specific chromosomal translocations or atypical events narrowing down the CNV critical interval to individual genes.

### **Genetic architecture predisposes individuals to recurrent and non-recurrent CNVs**

Local sequence architecture predisposes certain regions of the genome to recurrent rearrangements [5-7]. While an estimated 69% of these events occur as a result of recombination errors during meiosis, other mechanisms including non-homologous end joining, replication-based events (such as

microhomology-mediated break-induced replication or MMBIR/fork stalling and template switching or FoSTeS), and complex rearrangements due to multiple template switching events have also been reported [8]. Non-allelic homologous recombination (NAHR), classically termed unequal crossover was originally proposed for copy number changes at the *Bar* locus in fruit flies [9, 10], and was also used to explain the mechanism for gene loss and gain at the hemoglobin alpha subunit (HBA) [11], and evolution and expansion of repeat sequences in yeast [12] and humans [13].

For disorders resulting from genomic rearrangements, the concept of NAHR was initially described where deletions and duplications of the genomic interval on chromosome 17p12 containing *PMP22* were associated with Charcot-Marie-Tooth disease 1A (CMT1A) and Hereditary neuropathy with liability to pressure palsies (HNPP), respectively [14, 15]. These genomic intervals are flanked by large blocks of repeats with high sequence identity called segmental duplications (SDs) or low copy repeats that form substrates for NAHR events [5, 16]. The products of these events will either be a deletion or a reciprocal duplication leading to haploinsufficiency or triploinsufficiency of genes within the region. This signature feature predisposes up to 9% of the human genome to recurrent deletions and duplications making approximately 3000 genes vulnerable to dosage alteration [17]. A genome-wide assessment revealed as many as 130 such hotspots, which are flanked by SDs in the human genome that predisposes individuals to neurodevelopmental disorders [7, 17]. Other classical examples of disorders caused by SD-mediated rearrangements include Smith-Magenis syndrome (SMS) [18] and Potocki-Lupski syndrome (PTLS) [19] (17p11.2 deletion and duplication respectively), Williams-Beuren (WBS) syndrome (7q11.23 deletion) [20] and 7q11.23 duplication [21], Sotos syndrome (5q35 deletion) [22], DiGeorge/velocardiofacial syndrome (DGS) (22q11.2 deletion) [23], Prader-Willi (PWS)/Angelman syndrome (AS) (15q11.2-q13.1 deletion) [24], and 17q21.1 deletion [7]. While most of the classically defined syndromes were identified through conventional cytogenetics [25] and careful phenotypic

assessment, recent studies using targeted approaches for novel CNV discoveries have led to the identification of another class of CNVs that are more common in frequency and are associated with a range of neurodevelopmental phenotypes including autism, intellectual disability, epilepsy, and schizophrenia. Examples in this series include CNVs within 1q21.1, 3q29, 15q13.3, 15q24, 16p11.2, 16p12.2, 16p13.11, and 17q12 [26].

Genetic predilections to rearrangements within hotspots are dependent upon the presence of directly oriented SDs of high sequence identity [5]. Such configurations are present at different frequencies in the population making only a subset of the individuals susceptible, while others without the predisposing architecture are protected against disease-associated rearrangements [27, 28]. The density of SDs seems to correlate with susceptibility to rearrangements [29]. For example, increased copy numbers of SDs flanking the 7q11.23 region have been linked to a pronounced risk for rearrangements leading to WBS [30]. Structural susceptibility to rearrangements is particularly favored by inversions in the region, which align the two participating SDs in direct orientation. Inversion polymorphisms have been described for several human disease-associated regions including chromosomal regions 3q29 [31], 7q11.23 [32], 8p23 [33], 15q11.2q13.1 [34], 15q13.3 [35], 15q24.1, 16p12.1, 17q12, and 17q21.31 [36]. For example, SD architecture at the recently described 16p12.1 microdeletion has two structural configurations, referred to as the S1 and S2 haplotypes [27]. The two haplotypes have different worldwide frequencies (frequency for S1 is 17.6% and S2 is 82.4%) and differ by 333 kbp of additional sequence in S2 compared to S1. In the rearrangement prone S2 configuration there is a direct orientation of specific SDs flanking the disease-associated region, which is not seen in the protective S1 haplotype. Similar analyses have been performed for other hotspot regions providing a map of regions that are susceptible or protective against recurrent rearrangements [31, 37].

Replication-based mechanisms such as FoSTeS or MMBIR have been proposed to explain non-recurrent and complex genomic rearrangements [38, 39]. These models were described in human disease-associated rearrangements based on the observations in yeast [40] and bacteria [41] that have shown similar mechanistic signatures [42]. These rearrangements are generally characterized by multiple rounds of template switching over long distances leading to multiple copy number changes and the presence of microhomology at breakpoint junctions. The FoSTeS/MMBIR mechanism has been implicated in *PLP1* duplications in Pelizaeus-Merzbacher disease [38], *MECP2* duplication [43], *FOXL2* deletions [44], and *LIS1* deletions and duplications [42]. From these studies it is clear that multiple mechanisms based on DNA recombination, replication, and repair processes are involved in genome evolution.

### **Causal gene discovery within rare CNVs**

Rare CNVs often contain multiple unrelated genes and manifest complex neurodevelopmental and neuropsychiatric phenotypes [45]. Due to the large number of genes involved, it has been challenging to identify specific genes of functional relevance and correlate them to a phenotype. Gene discovery within rare CNVs has been mostly aided by chromosomal events unraveling the causative genes involved in a specific phenotype. Serendipitous translocations disrupting causal genes within the region have facilitated the discovery of *NSD1* in Sotos syndrome [46], and *SHANK3* in Phelan-McDermid syndrome [47]. Similarly, a maternally inherited inversion led to the discovery of *UBE3A* in Angelman syndrome [48]. Mapping of CNVs from patients displaying the same phenotypes but with atypical deletions or duplications has been used in identifying the minimum critical region carrying the candidate genes. Examples include the narrowing of the 17q21.31 region to a single gene by using atypical events that were not mediated by NAHR, leading to the identification of *KANSL1* (involved in

histone acetylation) as a causative gene in 17q21.31 microdeletion syndrome [49, 50]. In fact, clinical features in individuals with *KANSL1* mutations were almost indistinguishable from those carrying the deletion. Another example is the use of atypical deletions caused by alternate pairs of segmental duplications to identify a critical region containing three genes, *RAI1*, *TOM1L2*, and *DRG2*, within the SMS deletion interval [51, 52]. Further sequencing of these genes in individuals manifesting most SMS features resulted in the identification of disruptive mutations in the retinoic acid induced 1 (*RAI1*) gene. Atypical duplications within 17p11.2 also pointed towards *RAI1* as a major gene for PTLIS [53]. This approach is limited by the availability of patients with similar phenotypes carrying atypical deletions and is more geared towards identifying loss of function alleles than gain of function. In a recent study, Coe and colleagues extended the morbidity map of CNVs in the human genome by analyzing 29,085 children with developmental delay and 19,584 healthy controls. Comparing enrichment of deletions and duplications in the two groups over the entire genome, this study identified 70 regions significantly associated with disease [54]. They were also able to identify several novel and atypical CNVs pointing to specific genes, including 26 candidates that were further interrogated for loss of function mutations within 4,716 cases and 2,193 controls by targeted sequencing approaches. By integrating the analysis of CNVs and single nucleotide mutations, ten genes associated with specific subtypes of developmental delay disorders were identified.

Unmasking of recessive alleles has also contributed to identifying the causal genes for specific phenotypes. Recessive alleles manifest their phenotype when they are in a homozygous state. However, a recessive allele on one chromosome can be unmasked to display its phenotype by deletion of the normal allele on the other chromosome. Thus the patient will exhibit phenotypes resulting from the haploinsufficiency of dosage-sensitive genes in the deleted region and from loss-of-function due to the recessive mutation. For example, a recessive mutation in the myosin gene (*MYO15A*) within the 17p11.2



region was identified in a SMS patient manifesting profound sensorineural hearing loss [55]. In a recent study of an individual with the autism/developmental delay associated 16p11.2 deletion, the clinical phenotypes were different from the usual 16p11.2 deletion phenotypes, and chromosomal microarray analysis revealed an additional 220-kbp deletion of the distal 16p11.2 region [56]. Since the affected individual's phenotypes were similar to juvenile neuronal ceroid-lipofuscinosis or Batten disease and the 220-kbp deletion partially included *CLN3*, a known candidate gene for the phenotype, Pebrel-Richard and colleagues were able to sequence and confirm a mutation in the *CLN3* allele. Unmasking of the recessive *CLN3* mutation therefore explained the variability observed in this patient. Similarly, oculocutaneous albinism was reported in an individual with Prader-Willi syndrome (PWS) and a recessive mutation of *OCA2*, a gene essential for normal pigmentation [57]. A complex inheritance pattern was described for individuals carrying proximal deletions of 1q21.1 and manifesting distal thrombocytopenia-absent radius (TAR) syndrome. In contrast to other syndromic disorders, where almost all CNVs are *de novo*, this deletion was also observed in unaffected parents suggesting the deletion to be necessary but not sufficient to cause the syndrome [58]. Further studies using exome sequencing of TAR patients with 1q21.1 deletions identified low-frequency non-coding SNPs located in the 5' UTR and first intron of *RBM8A* and follow up *in vitro* studies revealed that these non-coding SNPs caused a decrease in *RBM8A* expression [59]. These studies suggested a compound or biallelic inheritance in TAR syndrome of a non-coding SNP and a rare null allele in *RBM8A* (1q21.1 microdeletion).

### **Models to explain causality of disease due to rare CNVs**

The association of genes in rare CNVs with phenotypes can be broadly categorized under three models (**Figure 1**). In the single gene model there is one major gene that leads to most of the disease

phenotypes. An example from this category is the retinoic acid induced 1 (*RAI1*) gene implicated in Smith-Magenis syndrome. Comparison of clinical features of children with the deletion with those with *RAI1* mutations suggested that haploinsufficiency of *RAI1* is responsible for the core features of SMS while the variability and severity of the disorder was conferred by other genes in the deletion region [60]. Similarly, the cardinal features of Sotos syndrome were observed in similar proportions in individuals with *NSD1* mutations compared to those with 5q35 deletions [61]. Thus, the major features of Sotos syndrome can be explained by haploinsufficiency of *NSD1*. Evidence from translocation breakpoints and atypical deletions pointed to *EHMT1* as a major contributor towards the clinical features observed in individuals with 9q34 deletion or Kleefstra syndrome [62]. Further, patients without the 9q34 deletion but with loss-of-function *EHMT1* mutations showed typical features of Kleefstra syndrome, including severe intellectual disability, hypotonia, pathognomonic craniofacial features, conotruncal heart defects, and behavioral problems, exemplifying the one gene model for rare CNV disorders [63].

In the contiguous gene model, each gene contributes to a phenotype, which collectively results in multiple unrelated features in a single individual carrying the rare CNV. A classical example is that of WBS, which is associated with a constellation of clinical features including facial dysmorphism, intellectual disability, connective tissue abnormalities, supraaortic stenosis, hypersociability, hypercalcemia, and behavioral features [64]. Chromosomal deletions on 7q11.23 leading to WBS results in the disruption of 26 to 28 genes. Contribution of haploinsufficiency of certain individual genes towards specific phenotypes in WBS was essentially identified by analysis of atypical deletions. Typical characteristic features of WBS include facial dysmorphism, connective tissue alterations, mild growth retardation, cardiac defects, mild-to-moderate intellectual disability and behavioral defects including motor problems, hypersociability and visuospatial defects [64]. Multiple studies involving

meticulous phenotyping of each of the WBS phenotypes in combination with mapping of atypical deletions resulted in the correlation of specific phenotypes to genes within 7q11.23. For example, haploinsufficiency of *ELN* was implicated in cardiac phenotypes [65], *GTF2IRD1* for craniofacial features, *GTF2I* and *GTF2IRD1* for neurobehavioral features [66-68], and *LIMK1* for visuospatial impairments. Interestingly, haploinsufficiency of *NCF1* was identified to be protective against hypertension in individuals with the deletion [69]. Further analysis of atypical deletions extending telomeric to the WBS region by Marshall and colleagues implicated *MAGI2* as causal for infantile spasms [70].

In the *cis*-interaction model, the combined effect of dosage alteration of two or more genes within the CNV region leads to the disease phenotypes. Theoretically, phenotypes caused by CNVs can be expected to be due to additive or synergistic interaction of multiple genes within the region. This model can potentially explain the severity of brain malformations in individuals carrying 17p13.3 deletions containing both *PAFAH1B1* (encoding LIS1) and *YWHAE* [71]. Individuals with deletions involving *PAFAH1B1* present with isolated lissencephaly features while individuals with larger deletions involving *YWHAE* show more severe forms of lissencephaly. Using mouse studies, Toyo-oka and colleagues showed that *YWHAE* is an essential component for optimal neuronal migration and acted through its interaction with NUDEL, a protein that also interacts with LIS1 for neuronal migration [72]. Thus, disruption of two genes interacting within the same multi-protein complex required for neuronal migration resulted in a more severe phenotype. A recent example of the *cis*-interaction model was observed for 17p13.1 deletion syndrome where dosage alterations of discrete pairings of genes within the region induced microcephaly phenotypes [73].

The concept of genetic background and modifier genes has been proposed previously [74, 75]. It was recently observed that the phenotypic effect of rare CNVs could be modified by another large CNV

elsewhere in the genome. The *trans*-interaction model can be illustrated by the 16p12.1 microdeletion. Severely affected children often inherited the deletion from a carrier parent who manifested only subtle neuropsychiatric features [76]. Further investigation revealed that about 25% of the probands carried another large CNV elsewhere in the genome, in addition to the 16p12.1 deletion, potentially dictating the ultimate phenotypic outcome. Extension of this “two-hit” model suggested a generalizable feature for rare CNVs [77]. Individuals manifesting CNV syndromes such as Sotos syndrome and Smith-Magenis syndrome carried fewer or no second hits while those carrying CNVs associated with variable expressivity such as 16p11.2 deletion, 15q13.3 deletion, and 1q21.1 deletion carried another large CNV. The *trans*-interaction model could explain these observations, wherein there is a compounding effect of two or more genes interacting in the same or related pathways in an additive or synergistic manner [78].

In the parent-of-origin model, phenotypes can vary depending upon whether the disrupted genes were derived from maternal or paternal chromosomes. Loss of the paternal segment of chromosomal region 15q11.2-q13.1 results in PWS, characterized by growth retardation, hypotonia, intellectual disability, obesity, hypogonadism, craniofacial features, and short stature [79]. Originally described as a true contiguous gene syndrome, recent studies have identified patients with loss of only one of the snoRNA clusters within the paternally imprinted segment who still manifest typical features of PWS [80, 81]. Similarly, loss of the maternal segment of ubiquitin-protein ligase E3A (*UBE3A*) within 15q11.2-q13.1 results in AS with individuals manifesting intellectual disability, speech and language delay, movement disorders, behavioral abnormalities, and seizures [48, 82].

### **Animal models for rare CNV disorders**

Animal models for human diseases are important for validation of pathogenicity, establishing a link between genes/genomic regions and phenotypes, and providing a resource to study disease mechanisms

relevant to human physiology. Animal models have been especially useful in delineating specific genes within disease-associated regions that were not mapped by translocations or atypical CNVs. We will focus on examples from mouse, zebrafish, and fruit fly models utilized for functional evaluation of rare CNV disorders (**Table 1**).

## Mouse models

The mouse genome is highly similar to the human genome, with 99% of mouse genes having human orthologs [83]. The mouse genome also displays extensive synteny, with conserved gene order, structure, and orientation compared to the human genome, rendering modeling of rare CNVs in mouse straightforward. Development of a Cre/*loxP* system for targeting chromosomal regions has enabled the creation of different sized deletions and duplications involving disease associated regions [84]. Here, gene targeting is used to insert *loxP* sites into putative CNV breakpoint locations in the ES cell genome, which is then exposed to Cre to induce recombination between the *loxP* sites and generate the rearrangement. These targeted ES cell clones are injected into mouse blastocysts, and embryos are transferred to pseudo-pregnant mice resulting in the birth of chimeras. Chimeric mice with cells targeted for the gene or genomic region of interest are then mated with wild type mice for germline transmission. Mouse models engineered for deletion or duplication of the entire CNV region have been used to recapitulate human CNV disorders, while nested deletions and gene-specific knockouts have been used to map specific genes to a particular phenotype. Genetic mouse models have been generated for a number of rare CNVs, including 7q11.23, 22q11.2, 17p11.2, 15q13.3, and 16p11.2 (**Table 1**). Some examples are illustrated in this review.

The molecular genetic basis of DGS due to a 22q11.2 deletion, the most common microdeletion disorder, was dissected using mouse models. In patients, this deletion results in craniofacial

abnormalities, cleft palate, thymus aplasia (or hypoplasia), hypocalcaemia, and cardiovascular defects [85]. More variable features include cognitive and behavioral defects, such as schizophrenia, intellectual disability, and autism spectrum disorders [86]. In fact, the first causative genes for DGS were identified from mouse studies [87]. Several independent groups identified *Tbx1* as a major contributor to some of the phenotypes observed in DGS patients by using a combination of overlapping deletions and targeted single gene mutations in mice [88-93]. Further analysis of a series of deletions and single gene mutants in mice, using prepulse inhibition as an indicator for sensorimotor gating and behavioral features, confirmed the role of *Tbx1* and implicated the potential role of *Gnb1l* towards psychiatric features associated with 22q11.2 deletion [94]. Only later were mutations in *TBX1* identified in affected human patients confirming their role in DGS phenotypes [94-97]. While these studies have provided insights into the pathobiological basis of DGS, the often-observed high variation in phenotypic expressivity remains unexplained. It is possible that alterations in other genes such as *GNB1L* and *COMT* within or outside of the region [94, 98, 99], along with haploinsufficiency of *TBX1* contribute to variable expressivity. Several genes, both within 22q11.2 and in other genomic regions, have been found to interact with *Tbx1* and exacerbating the phenotypic features in mouse models [99-103]. The results and observations thus far support the model that haploinsufficiency of *TBX1* is sufficient to cause DGS.

Phenotypes observed in SMS and PTLs have also been recapitulated in mice engineered to carry a deletion and duplication, respectively, of the syntenic region on mouse chromosome 11 [104, 105]. The involvement of *Rai1* in SMS was further validated in *Rai1* knockout mice that demonstrated craniofacial and behavioral features [106, 107]. Comparison of SMS mouse models with different sized deletions containing *Rai1* with the *Rai1*<sup>+/-</sup> mice, in a relatively pure C57BL/6 background, showed that the penetrance of craniofacial features were modified by the genomic region surrounding *Rai1* [108].

Similarly, most features of PTLs were identified in transgenic mice overexpressing *Rai1* [109, 110]. In an elegant study, Walz and colleagues generated compound heterozygous mice carrying both deletion and duplication of 17p11.2 as well as mice carrying the duplication and *Rai1* loss-of-function mutation [111]. The results showed normal *Rai1* dosage and rescue of phenotypes due to 17p11.2 duplication, confirming the dosage sensitive role of *RAI1* in both SMS and PTLs.

The molecular genetic basis of WBS has been dissected using mouse models with partial deletions, proximal deletion, distal deletion, double heterozygote and single gene knockouts for genes within 7q11.23 [68, 112-116]. For example, single gene knockouts have been generated for promising candidate genes such as *ELN*, *CYLN2*, *GTF2IRD1*, *GTF2I*, *LIMK1*, *EIF4H*, *BAZ1B*, and *FKBP6* that recapitulated specific phenotypes and mechanisms in WBS. In a recent study, Segura-Puimedon and colleagues generated a mouse model that mimicked the most common deletion found in WBS patients. The complete deletion mouse represented a “true” WBS model, recapitulating almost all of the physical and cognitive defects seen in WBS patients [117]. Mouse models for the reciprocal duplication of WBS on 7q11.23 are not available yet. Mervis and colleagues studied anxiety phenotypes that are observed in about 30% of individuals with the 7q11.2 duplication [118]. Mice that carried increased copies of the general transcription factor 2I (*Gtf2I*) gene produced more separation anxiety behaviors compared to mice with decreased copies of the gene.

Mouse models have also been characterized for certain recently identified rare CNVs. Deletion and duplication of the mouse syntenic region for human 16p11.2 have been created by chromosome engineering [119, 120]. Clinical features in children with the 16p11.2 deletion include autism, intellectual disability, obesity, and epilepsy, while the reciprocal duplication has been associated with schizophrenia and other neurodevelopmental phenotypes. Mice engineered for these CNVs showed behavioral phenotypes and defects in brain architecture with deletion mice showing more severe features

than the duplication mice. However, these studies have yet to be extended to identify specific causative genes for the observed phenotypes. Similarly, mouse models of 15q13.3 microdeletion harboring six genes including *CHRNA7* have been created [121]. The 15q13.3 microdeletion has been enriched in individuals with epilepsy, developmental delay, autism, and schizophrenia. Mice carrying deletions of the syntenic region for human 15q13.3 exhibited increased susceptibility to seizures, impaired spatial reference memory, aggression, increased body weight, and auditory processing defects, recapitulating most of the clinical features observed in patients with the deletion. However, certain behavioral phenotypes related to schizophrenia, such as anxiety-related behavior, working memory, and amygdala-dependent learning and memory were not observed in these mice. These phenotypes might be contingent upon the effects of genetic background and/or environmental factors.

## **Zebrafish models**

Zebrafish is a tropical freshwater fish that has been an attractive model system to study embryogenesis and organ development. The advantages conferred by the short generation time, the ability to evaluate large populations, and easy access of transparent embryos for observation and manipulation make zebrafish a more sought after model for high throughput genomic screens [122, 123]. The annotated genome of zebrafish indicates that about 70% of genes have orthologs in humans [123]. In recent years, the zebrafish has emerged as a powerful model for the functional analysis of genes within rare CNVs. Two landmark studies have exemplified the use of zebrafish for prioritizing candidate genes within 16p11.2. Blaker-Lee and colleagues carefully assessed phenotypes for overexpression and knockdown for all available 16p11.2 orthologs in zebrafish and found that several genes are highly active, contributing to various phenotypes in a dosage-sensitive manner [124]. Using a different strategy, Golzio and colleagues studied epistatic effects by using discrete gene pairs to identify the contribution of



specific genes towards neuroanatomical phenotypes [125]. Using morpholinos to suppress the expression of genes and human mRNA injections for overexpression, *KCTD13* was identified as a major driver for the microcephaly and macrocephaly phenotypes associated with 16p11.2 CNVs. Similarly, a recent study on 17p13.1 deletion syndrome showed that dosage alterations of a combination of genes within the critical interval resulted in microcephaly features in zebrafish, reminiscent of those observed in patients. Causative genes responsible for phenotypes in 8q24.3 deletion were also identified using functional studies in zebrafish. Individuals with 8q24.3 deletion manifest craniofacial anomalies, developmental delay, coloboma, cardiac defects, psychomotor delay, and convulsions [126-128]. Using atypical deletions, the minimum critical region was narrowed down to three genes including *SCRIB*, *NRBP2* and *PUF60* [128]. Further functional studies using morpholino-induced knockdown identified the contributions of the cell polarity effector *SCRIB* and the splicing factor *PUF60* towards the phenotypes observed in individuals with 8q24.3 deletion.

## **Fruit fly models**

*Drosophila* has been used in genetics research for more than 100 years and has been instrumental in understanding gene mutations, genes involved in different pathways, and molecular processes [129]. About 75% of human disease associated genes have orthologs in *Drosophila* [130]. Compared to mouse, the fruit fly carries several advantages, including a short generation time, low costs for rearing and maintenance in the laboratory, and is amenable for behavioral and neuronal studies. There have been several advances in the genetic tool kit of *Drosophila* over the years, including transposition of exogenous DNA to generate transgenic flies, tissue specific expression using the UAS-GAL4 system [131], and RNA-interference-mediated knockdown [132], among many others. These advances have made *Drosophila* an extremely powerful and sophisticated genetic model system for identifying and

analyzing complex biological processes. *Drosophila* also serves as a powerful tool for studying brain development and related disorders as the principles of nervous system development and function are similar to those of vertebrates.

For example, *UBE3A*, the causative gene for Angelman syndrome, has been successfully modeled in fruit flies. Wu and colleagues generated *dUBE3A* null mutants that exhibited motor defects, abnormal circadian rhythms, and long-term memory defects [133]. These results were further reproduced by introducing a transgene containing missense mutations analogous to the ones identified in Angelman syndrome patients in null mutant background. Upon overexpression of the *dUBE3A* specifically in the eye and wing, morphological abnormalities were observed suggesting a significant role in early development. In another study, Lu and colleagues showed that *dUBE3A* null mutants display abnormalities in dendritic arborization of sensory neurons in the peripheral nervous system [134]. They were also able to reproduce these results in RNAi knockdown of *UBE3A*. These findings implicate a role for *dUBE3A* in normal dendritic branching/patterning and suggest that abnormal dendritic arbors may contribute to neurological defects in AS patients. Mutational analysis in *Drosophila* identified a role for *EHMT1* as a regulator of peripheral dendrite development, larval locomotor behavior, non-associative learning, and courtship memory [135]. Interestingly, memory was restored in *EHMT* mutants by restoring the expression of *EHMT* in adulthood, indicating the reversible nature of the cognitive defects associated with *EHMT1* deficiency. Further analysis identified a set of downstream neuronal genes that control learning, memory, and behavior. Thus, fruit flies can be used to dissect specific neuronal mechanisms altered due to mutations in conserved genes within rare CNVs.

## Conclusions

Rare CNVs are like the canaries in the coalmine, pointing toward candidate genes within the regions of interest. Genome architecture predisposes certain regions to recurrent rearrangements, and these regions are significantly enriched for genes important for neurodevelopment. While the causative genes have been identified based on chromosomal events or atypical deletions, individual genes conferring specific phenotypes have not been identified for a vast majority of rare CNVs discovered recently. Even though mice have been the standard models for functional evaluation, the high costs involved in generating and maintaining mouse lines and the daunting task of knocking out each and every gene within the CNV region in mice, among many other reasons, has made way for zebrafish and *Drosophila* as tools for high throughput screening. It is important to note that each model has its own advantages and disadvantages and a combination of all the models is required to understand the molecular mechanisms leading to rare CNV disorders.

## ACKNOWLEDGEMENTS

We thank Andrew Polyak, Claire Reynolds, Lucilla Pizzo, Megan Schilling, and Sneha Yennawar for critical reading of the manuscript.

## FUNDING

Work in Santhosh Girirajan's laboratory is supported by the Basil O'Connor Award from the March of Dimes Foundation and the Young Investigator Award from the Brain and Behavior Foundation.

## REFERENCES

1. Girirajan S, Campbell CD, Eichler EE. Human copy number variation and complex genetic disease, *Annual Review of Genetics* 2011;45:203-226.
2. Lupski JR. Genomic rearrangements and sporadic disease, *Nature Genetics* 2007;39:S43-47.
3. Itsara A, Cooper GM, Baker C et al. Population analysis of large copy number variants and hotspots of human genetic disease, *American Journal of Human Genetics* 2009;84:148-161.
4. Alkan C, Coe BP, Eichler EE. Genome structural variation discovery and genotyping, *Nature Reviews. Genetics* 2011;12:363-376.
5. Bailey JA, Gu Z, Clark RA et al. Recent segmental duplications in the human genome, *Science* 2002;297:1003-1007.
6. Lupski JR. Genomic disorders: structural features of the genome can lead to DNA rearrangements and human disease traits, *Trends in Genetics* 1998;14:417-422.
7. Sharp AJ, Hansen S, Selzer RR et al. Discovery of previously unidentified genomic disorders from the duplication architecture of the human genome, *Nature Genetics* 2006;38:1038-1042.
8. Kidd JM, Graves T, Newman TL et al. A human genome structural variation sequencing resource reveals insights into mutational mechanisms, *Cell* 2010;143:837-847.
9. Sturtevant AH. The Effects of Unequal Crossing over at the Bar Locus in *Drosophila*, *Genetics* 1925;10:117-147.
10. Lewis EB. Another Case of Unequal Crossing-Over in *Drosophila Melanogaster*, *Proceedings of the National Academy of Sciences of the United States of America* 1941;27:31-35.
11. Zimmer EA, Martin SL, Beverley SM et al. Rapid duplication and loss of genes coding for the alpha chains of hemoglobin, *Proceedings of the National Academy of Sciences of the United States of America* 1980;77:2158-2162.
12. Szostak JW, Wu R. Unequal crossing over in the ribosomal DNA of *Saccharomyces cerevisiae*, *Nature* 1980;284:426-430.
13. Jeffreys AJ, Royle NJ, Wilson V et al. Spontaneous mutation rates to new length alleles at tandem-repetitive hypervariable loci in human DNA, *Nature* 1988;332:278-281.
14. Chance PF, Alderson MK, Leppig KA et al. DNA deletion associated with hereditary neuropathy with liability to pressure palsies, *Cell* 1993;72:143-151.
15. Lupski JR, de Oca-Luna RM, Slaugenhaupt S et al. DNA duplication associated with Charcot-Marie-Tooth disease type 1A, *Cell* 1991;66:219-232.

16. Stankiewicz P, Lupski JR. Genome architecture, rearrangements and genomic disorders, *Trends in Genetics* 2002;18:74-82.
17. Girirajan S, Dennis MY, Baker C et al. Refinement and discovery of new hotspots of copy-number variation associated with autism spectrum disorder, *American Journal of Human Genetics* 2013;92:221-237.
18. Chen KS, Manian P, Koeuth T et al. Homologous recombination of a flanking repeat gene cluster is a mechanism for a common contiguous gene deletion syndrome, *Nature Genetics* 1997;17:154-163.
19. Potocki L, Chen KS, Park SS et al. Molecular mechanism for duplication 17p11.2- the homologous recombination reciprocal of the Smith-Magenis microdeletion, *Nature Genetics* 2000;24:84-87.
20. Antonell A, de Luis O, Domingo-Roura X et al. Evolutionary mechanisms shaping the genomic structure of the Williams-Beuren syndrome chromosomal region at human 7q11.23, *Genome Research* 2005;15:1179-1188.
21. Somerville MJ, Mervis CB, Young EJ et al. Severe expressive-language delay related to duplication of the Williams-Beuren locus, *New England Journal of Medicine* 2005;353:1694-1701.
22. Visser R, Shimokawa O, Harada N et al. Identification of a 3.0-kb major recombination hotspot in patients with Sotos syndrome who carry a common 1.9-Mb microdeletion, *American Journal of Human Genetics* 2005;76:52-67.
23. Edelmann L, Pandita RK, Morrow BE. Low-copy repeats mediate the common 3-Mb deletion in patients with velo-cardio-facial syndrome, *American Journal of Human Genetics* 1999;64:1076-1086.
24. Amos-Landgraf JM, Ji Y, Gottlieb W et al. Chromosome breakage in the Prader-Willi and Angelman syndromes involves recombination between large, transcribed repeats at proximal and distal breakpoints, *American Journal of Human Genetics* 1999;65:370-386.
25. Emanuel BS, Saitta SC. From microscopes to microarrays: dissecting recurrent chromosomal rearrangements, *Nature Reviews. Genetics* 2007;8:869-883.
26. Girirajan S, Eichler EE. Phenotypic variability and genetic susceptibility to genomic disorders, *Human Molecular Genetics* 2010;19:R176-187.
27. Antonacci F, Kidd JM, Marques-Bonet T et al. A large and complex structural polymorphism at 16p12.1 underlies microdeletion disease risk, *Nature Genetics* 2010;42:745-750.
28. Zody MC, Jiang Z, Fung HC et al. Evolutionary toggling of the MAPT 17q21.31 inversion region, *Nature Genetics* 2008;40:1076-1083.
29. Sharp AJ, Locke DP, McGrath SD et al. Segmental duplications and copy-number variation in the human genome, *American Journal of Human Genetics* 2005;77:78-88.

30. Cusco I, Corominas R, Bayes M et al. Copy number variation at the 7q11.23 segmental duplications is a susceptibility factor for the Williams-Beuren syndrome deletion, *Genome Research* 2008;18:683-694.
31. Antonacci F, Kidd JM, Marques-Bonet T et al. Characterization of six human disease-associated inversion polymorphisms, *Human Molecular Genetics* 2009;18:2555-2566.
32. Osborne LR, Li M, Pober B et al. A 1.5 million-base pair inversion polymorphism in families with Williams-Beuren syndrome, *Nature Genetics* 2001;29:321-325.
33. Giglio S, Broman KW, Matsumoto N et al. Olfactory receptor-gene clusters, genomic-inversion polymorphisms, and common chromosome rearrangements, *American Journal of Human Genetics* 2001;68:874-883.
34. Gimelli G, Pujana MA, Patricelli MG et al. Genomic inversions of human chromosome 15q11-q13 in mothers of Angelman syndrome patients with class II (BP2/3) deletions, *Human Molecular Genetics* 2003;12:849-858.
35. Antonacci F, Dennis MY, Huddleston J et al. Palindromic GOLGA8 core duplicons promote chromosome 15q13.3 microdeletion and evolutionary instability, *Nature Genetics* 2014.
36. Stefansson H, Helgason A, Thorleifsson G et al. A common inversion under selection in Europeans, *Nature Genetics* 2005;37:129-137.
37. Feuk L. Inversion variants in the human genome: role in disease and genome architecture, *Genome Med* 2010;2:11.
38. Lee JA, Carvalho CM, Lupski JR. A DNA replication mechanism for generating nonrecurrent rearrangements associated with genomic disorders, *Cell* 2007;131:1235-1247.
39. Hastings PJ, Ira G, Lupski JR. A microhomology-mediated break-induced replication model for the origin of human copy number variation, *PLoS Genetics* 2009;5:e1000327.
40. Payen C, Koszul R, Dujon B et al. Segmental duplications arise from Pol32-dependent repair of broken forks through two alternative replication-based mechanisms, *PLoS Genetics* 2008;4:e1000175.
41. Albertini AM, Hofer M, Calos MP et al. On the formation of spontaneous deletions: the importance of short sequence homologies in the generation of large deletions, *Cell* 1982;29:319-328.
42. Zhang F, Khajavi M, Connolly AM et al. The DNA replication FoSTeS/MMBIR mechanism can generate genomic, genic and exonic complex rearrangements in humans, *Nature Genetics* 2009;41:849-853.
43. Carvalho CM, Zhang F, Liu P et al. Complex rearrangements in patients with duplications of MECP2 can occur by fork stalling and template switching, *Human Molecular Genetics* 2009;18:2188-2203.

44. Verdin H, D'Haene B, Beysen D et al. Microhomology-mediated mechanisms underlie non-recurrent disease-causing microdeletions of the FOXL2 gene or its regulatory domain, *PLoS Genetics* 2013;9:e1003358.
45. Girirajan S, Brkanac Z, Coe BP et al. Relative burden of large CNVs on a range of neurodevelopmental phenotypes, *PLoS Genetics* 2011;7:e1002334.
46. Kurotaki N, Imaizumi K, Harada N et al. Haploinsufficiency of NSD1 causes Sotos syndrome, *Nature Genetics* 2002;30:365-366.
47. Bonaglia MC, Giorda R, Borgatti R et al. Disruption of the ProSAP2 gene in a t(12;22)(q24.1;q13.3) is associated with the 22q13.3 deletion syndrome, *American Journal of Human Genetics* 2001;69:261-268.
48. Kishino T, Lalande M, Wagstaff J. UBE3A/E6-AP mutations cause Angelman syndrome, *Nature Genetics* 1997;15:70-73.
49. Cooper GM, Coe BP, Girirajan S et al. A copy number variation morbidity map of developmental delay, *Nature Genetics* 2011;43:838-846.
50. Koolen DA, Kramer JM, Neveling K et al. Mutations in the chromatin modifier gene KANSL1 cause the 17q21.31 microdeletion syndrome, *Nature Genetics* 2012;44:639-641.
51. Slager RE, Newton TL, Vlangos CN et al. Mutations in RAI1 associated with Smith-Magenis syndrome, *Nature Genetics* 2003;33:466-468.
52. Vlangos CN, Yim DK, Elsea SH. Refinement of the Smith-Magenis syndrome critical region to approximately 950kb and assessment of 17p11.2 deletions. Are all deletions created equally?, *Molecular Genetics and Metabolism* 2003;79:134-141.
53. Potocki L, Bi W, Treadwell-Deering D et al. Characterization of Potocki-Lupski syndrome (dup(17)(p11.2p11.2)) and delineation of a dosage-sensitive critical interval that can convey an autism phenotype, *American Journal of Human Genetics* 2007;80:633-649.
54. Coe BP, Witherspoon K, Rosenfeld JA et al. Refining analyses of copy number variation identifies specific genes associated with developmental delay, *Nature Genetics* 2014;46:1063-1071.
55. Liburd N, Ghosh M, Riazuddin S et al. Novel mutations of MYO15A associated with profound deafness in consanguineous families and moderately severe hearing loss in a patient with Smith-Magenis syndrome, *Human Genetics* 2001;109:535-541.
56. Pebrel-Richard C, Debost-Legrand A, Eymard-Pierre E et al. An unusual clinical severity of 16p11.2 deletion syndrome caused by unmasked recessive mutation of CLN3, *European Journal of Human Genetics* 2014;22:369-373.
57. Lee ST, Nicholls RD, Bundey S et al. Mutations of the P gene in oculocutaneous albinism, ocular albinism, and Prader-Willi syndrome plus albinism, *New England Journal of Medicine* 1994;330:529-534.



58. Klopocki E, Schulze H, Strauss G et al. Complex inheritance pattern resembling autosomal recessive inheritance involving a microdeletion in thrombocytopenia-absent radius syndrome, *American Journal of Human Genetics* 2007;80:232-240.
59. Albers CA, Paul DS, Schulze H et al. Compound inheritance of a low-frequency regulatory SNP and a rare null mutation in exon-junction complex subunit RBM8A causes TAR syndrome, *Nature Genetics* 2012;44:435-439, S431-432.
60. Girirajan S, Vlangos CN, Szomju BB et al. Genotype-phenotype correlation in Smith-Magenis syndrome: evidence that multiple genes in 17p11.2 contribute to the clinical spectrum, *Genetics in Medicine* 2006;8:417-427.
61. Tatton-Brown K, Douglas J, Coleman K et al. Genotype-phenotype associations in Sotos syndrome: an analysis of 266 individuals with NSD1 aberrations, *American Journal of Human Genetics* 2005;77:193-204.
62. Kleefstra T, Smidt M, Banning MJ et al. Disruption of the gene Euchromatin Histone Methyl Transferase1 (Eu-HMTase1) is associated with the 9q34 subtelomeric deletion syndrome, *Journal of Medical Genetics* 2005;42:299-306.
63. Kleefstra T, van Zelst-Stams WA, Nillesen WM et al. Further clinical and molecular delineation of the 9q subtelomeric deletion syndrome supports a major contribution of EHMT1 haploinsufficiency to the core phenotype, *Journal of Medical Genetics* 2009;46:598-606.
64. Pober BR. Williams-Beuren syndrome, *New England Journal of Medicine* 2010;362:239-252.
65. Metcalfe K, Rucka AK, Smoot L et al. Elastin: mutational spectrum in supravalvular aortic stenosis, *European Journal of Human Genetics* 2000;8:955-963.
66. Dai L, Bellugi U, Chen XN et al. Is it Williams syndrome? GTF2IRD1 implicated in visual-spatial construction and GTF2I in sociability revealed by high resolution arrays, *American Journal of Medical Genetics. Part A* 2009;149A:302-314.
67. Edelmann L, Prosnitz A, Pardo S et al. An atypical deletion of the Williams-Beuren syndrome interval implicates genes associated with defective visuospatial processing and autism, *Journal of Medical Genetics* 2007;44:136-143.
68. Tassabehji M, Hammond P, Karmiloff-Smith A et al. GTF2IRD1 in craniofacial development of humans and mice, *Science* 2005;310:1184-1187.
69. Del Campo M, Antonell A, Magano LF et al. Hemizygoty at the NCF1 gene in patients with Williams-Beuren syndrome decreases their risk of hypertension, *American Journal of Human Genetics* 2006;78:533-542.
70. Marshall CR, Young EJ, Pani AM et al. Infantile spasms is associated with deletion of the MAGI2 gene on chromosome 7q11.23-q21.11, *American Journal of Human Genetics* 2008;83:106-111.



71. Bruno DL, Anderlid BM, Lindstrand A et al. Further molecular and clinical delineation of co-locating 17p13.3 microdeletions and microduplications that show distinctive phenotypes, *Journal of Medical Genetics* 2010;47:299-311.
72. Toyo-oka K, Shionoya A, Gambello MJ et al. 14-3-3epsilon is important for neuronal migration by binding to NUDEL: a molecular explanation for Miller-Dieker syndrome, *Nature Genetics* 2003;34:274-285.
73. Carvalho CM, Vasanth S, Shinawi M et al. Dosage Changes of a Segment at 17p13.1 Lead to Intellectual Disability and Microcephaly as a Result of Complex Genetic Interaction of Multiple Genes, *American Journal of Human Genetics* 2014;95:565-578.
74. Nadeau JH. Modifier genes in mice and humans, *Nature Reviews Genetics* 2001;2:165-174.
75. Haldane JB. The relative importance of principal and modifying genes in determining some human diseases, *Journal of Genetics* 1941;41:149-157.
76. Girirajan S, Rosenfeld JA, Cooper GM et al. A recurrent 16p12.1 microdeletion supports a two-hit model for severe developmental delay, *Nature Genetics* 2010;42:203-209.
77. Girirajan S, Rosenfeld JA, Coe BP et al. Phenotypic heterogeneity of genomic disorders and rare copy-number variants, *New England Journal of Medicine* 2012;367:1321-1331.
78. Veltman JA, Brunner HG. Understanding variable expressivity in microdeletion syndromes, *Nature Genetics* 2010;42:192-193.
79. Cassidy SB, Driscoll DJ. Prader-Willi syndrome, *European Journal of Human Genetics* 2009;17:3-13.
80. de Smith AJ, Purmann C, Walters RG et al. A deletion of the HBII-85 class of small nucleolar RNAs (snoRNAs) is associated with hyperphagia, obesity and hypogonadism, *Human Molecular Genetics* 2009;18:3257-3265.
81. Sahoo T, del Gaudio D, German JR et al. Prader-Willi phenotype caused by paternal deficiency for the HBII-85 C/D box small nucleolar RNA cluster, *Nature Genetics* 2008;40:719-721.
82. Rougeulle C, Glatt H, Lalande M. The Angelman syndrome candidate gene, UBE3A/E6-AP, is imprinted in brain, *Nature Genetics* 1997;17:14-15.
83. Waterston RH, Lindblad-Toh K, Birney E et al. Initial sequencing and comparative analysis of the mouse genome, *Nature* 2002;420:520-562.
84. van der Weyden L, Bradley A. Mouse chromosome engineering for modeling human disease, *Annual Review of Genomics and Human Genetics* 2006;7:247-276.
85. Kobrynski LJ, Sullivan KE. Velocardiofacial syndrome, DiGeorge syndrome: the chromosome 22q11.2 deletion syndromes, *Lancet* 2007;370:1443-1452.

86. Karayiorgou M, Morris MA, Morrow B et al. Schizophrenia susceptibility associated with interstitial deletions of chromosome 22q11, *Proceedings of the National Academy of Sciences of the United States of America* 1995;92:7612-7616.
87. Lindsay EA. Chromosomal microdeletions: dissecting del22q11 syndrome, *Nature Reviews. Genetics* 2001;2:858-868.
88. Jerome LA, Papaioannou VE. DiGeorge syndrome phenotype in mice mutant for the T-box gene, *Tbx1*, *Nature Genetics* 2001;27:286-291.
89. Kimber WL, Hsieh P, Hirotsune S et al. Deletion of 150 kb in the minimal DiGeorge/velocardiofacial syndrome critical region in mouse, *Human Molecular Genetics* 1999;8:2229-2237.
90. Lindsay EA, Botta A, Jurecic V et al. Congenital heart disease in mice deficient for the DiGeorge syndrome region, *Nature* 1999;401:379-383.
91. Lindsay EA, Vitelli F, Su H et al. *Tbx1* haploinsufficiency in the DiGeorge syndrome region causes aortic arch defects in mice, *Nature* 2001;410:97-101.
92. Merscher S, Funke B, Epstein JA et al. TBX1 is responsible for cardiovascular defects in velocardio-facial/DiGeorge syndrome, *Cell* 2001;104:619-629.
93. Puech A, Saint-Jore B, Merscher S et al. Normal cardiovascular development in mice deficient for 16 genes in 550 kb of the velocardiofacial/DiGeorge syndrome region, *Proceedings of the National Academy of Sciences of the United States of America* 2000;97:10090-10095.
94. Paylor R, Glaser B, Mupo A et al. *Tbx1* haploinsufficiency is linked to behavioral disorders in mice and humans: implications for 22q11 deletion syndrome, *Proceedings of the National Academy of Sciences of the United States of America* 2006;103:7729-7734.
95. Torres-Juan L, Rosell J, Morla M et al. Mutations in TBX1 genocopy the 22q11.2 deletion and duplication syndromes: a new susceptibility factor for mental retardation, *European Journal of Human Genetics* 2007;15:658-663.
96. Yagi H, Furutani Y, Hamada H et al. Role of TBX1 in human del22q11.2 syndrome, *Lancet* 2003;362:1366-1373.
97. Zweier C, Sticht H, Aydin-Yaylagul I et al. Human TBX1 missense mutations cause gain of function resulting in the same phenotype as 22q11.2 deletions, *American Journal of Human Genetics* 2007;80:510-517.
98. Williams NM, Glaser B, Norton N et al. Strong evidence that GNB1L is associated with schizophrenia, *Human Molecular Genetics* 2008;17:555-566.
99. Chen YZ, Matsushita M, Girirajan S et al. Evidence for involvement of GNB1L in autism, *American Journal of Medical Genetics. Part B, Neuropsychiatric Genetics* 2012;159B:61-71.

100. Moon AM, Guris DL, Seo JH et al. Crkl deficiency disrupts Fgf8 signaling in a mouse model of 22q11 deletion syndromes, *Developmental Cell* 2006;10:71-80.
101. Randall V, McCue K, Roberts C et al. Great vessel development requires biallelic expression of Chd7 and Tbx1 in pharyngeal ectoderm in mice, *Journal of Clinical Investigation* 2009;119:3301-3310.
102. Taddei I, Morishima M, Huynh T et al. Genetic factors are major determinants of phenotypic variability in a mouse model of the DiGeorge/del22q11 syndromes, *Proceedings of the National Academy of Sciences of the United States of America* 2001;98:11428-11431.
103. Stalmans I, Lambrechts D, De Smet F et al. VEGF: a modifier of the del22q11 (DiGeorge) syndrome?, *Nature Medicine* 2003;9:173-182.
104. Bi W, Ohyama T, Nakamura H et al. Inactivation of Rai1 in mice recapitulates phenotypes observed in chromosome engineered mouse models for Smith-Magenis syndrome, *Human Molecular Genetics* 2005;14:983-995.
105. Walz K, Caratini-Rivera S, Bi W et al. Modeling del(17)(p11.2p11.2) and dup(17)(p11.2p11.2) contiguous gene syndromes by chromosome engineering in mice: phenotypic consequences of gene dosage imbalance, *Molecular and Cellular Biology* 2003;23:3646-3655.
106. Bi W, Yan J, Shi X et al. Rai1 deficiency in mice causes learning impairments and motor dysfunctions whereas Rai1 heterozygous mice display minimal behavioral phenotypes, *Human Molecular Genetics* 2007.
107. Girirajan S, Elsea SH. Distorted Mendelian transmission as a function of genetic background in Rai1-haploinsufficient mice, *European Journal of Medical Genetics* 2009;52:224-228.
108. Yan J, Bi W, Lupski JR. Penetrance of craniofacial anomalies in mouse models of Smith-Magenis syndrome is modified by genomic sequence surrounding Rai1: not all null alleles are alike, *American Journal of Human Genetics* 2007;80:518-525.
109. Girirajan S, Elsea SH. Abnormal maternal behavior, altered sociability, and impaired serotonin metabolism in Rai1-transgenic mice, *Mammalian Genome* 2009;20:247-255.
110. Girirajan S, Patel N, Slager RE et al. How much is too much? Phenotypic consequences of Rai1 overexpression in mice, *European Journal of Human Genetics* 2008;16:941-954.
111. Walz K, Paylor R, Yan J et al. Rai1 duplication causes physical and behavioral phenotypes in a mouse model of dup(17)(p11.2p11.2), *Journal of Clinical Investigation* 2006;116:3035-3041.
112. Li HH, Roy M, Kuscuoglu U et al. Induced chromosome deletions cause hypersociability and other features of Williams-Beuren syndrome in mice, *EMBO Mol Med* 2009;1:50-65.
113. Yoshimura K, Kitagawa H, Fujiki R et al. Distinct function of 2 chromatin remodeling complexes that share a common subunit, Williams syndrome transcription factor (WSTF), *Proceedings of the National Academy of Sciences of the United States of America* 2009;106:9280-9285.

114. Capossela S, Muzio L, Bertolo A et al. Growth defects and impaired cognitive-behavioral abilities in mice with knockout for Eif4h, a gene located in the mouse homolog of the Williams-Beuren syndrome critical region, *American Journal of Pathology* 2012;180:1121-1135.
115. Hoogenraad CC, Koekkoek B, Akhmanova A et al. Targeted mutation of Cyln2 in the Williams syndrome critical region links CLIP-115 haploinsufficiency to neurodevelopmental abnormalities in mice, *Nature Genetics* 2002;32:116-127.
116. Li DY, Brooke B, Davis EC et al. Elastin is an essential determinant of arterial morphogenesis, *Nature* 1998;393:276-280.
117. Segura-Puimedon M, Sahun I, Velot E et al. Heterozygous deletion of the Williams-Beuren syndrome critical interval in mice recapitulates most features of the human disorder, *Human Molecular Genetics* 2014.
118. Mervis CB, Dida J, Lam E et al. Duplication of GTF2I results in separation anxiety in mice and humans, *American Journal of Human Genetics* 2012;90:1064-1070.
119. Horev G, Ellegood J, Lerch JP et al. Dosage-dependent phenotypes in models of 16p11.2 lesions found in autism, *Proceedings of the National Academy of Sciences of the United States of America* 2011;108:17076-17081.
120. Portmann T, Yang M, Mao R et al. Behavioral abnormalities and circuit defects in the basal ganglia of a mouse model of 16p11.2 deletion syndrome, *Cell Rep* 2014;7:1077-1092.
121. Fejgin K, Nielsen J, Birknow MR et al. A mouse model that recapitulates cardinal features of the 15q13.3 microdeletion syndrome including schizophrenia- and epilepsy-related alterations, *Biological Psychiatry* 2014;76:128-137.
122. Streisinger G, Walker C, Dower N et al. Production of clones of homozygous diploid zebra fish (*Brachydanio rerio*), *Nature* 1981;291:293-296.
123. Davis EE, Frangakis S, Katsanis N. Interpreting human genetic variation with in vivo zebrafish assays, *Biochimica et Biophysica Acta* 2014;1842:1960-1970.
124. Blaker-Lee A, Gupta S, McCammon JM et al. Zebrafish homologs of genes within 16p11.2, a genomic region associated with brain disorders, are active during brain development, and include two deletion dosage sensor genes, *Dis Model Mech* 2012;5:834-851.
125. Golzio C, Willer J, Talkowski ME et al. KCTD13 is a major driver of mirrored neuroanatomical phenotypes of the 16p11.2 copy number variant, *Nature* 2012;485:363-367.
126. Koifman A, Feigenbaum A, Bi W et al. A homozygous deletion of 8q24.3 including the NIBP gene associated with severe developmental delay, dysgenesis of the corpus callosum, and dysmorphic facial features, *American Journal of Medical Genetics. Part A* 2010;152A:1268-1272.

127. Verheij JB, de Munnik SA, Dijkhuizen T et al. An 8.35 Mb overlapping interstitial deletion of 8q24 in two patients with coloboma, congenital heart defect, limb abnormalities, psychomotor retardation and convulsions, *European Journal of Medical Genetics* 2009;52:353-357.
128. Dauber A, Golzio C, Guenot C et al. SCRIB and PUF60 are primary drivers of the multisystemic phenotypes of the 8q24.3 copy-number variant, *American Journal of Human Genetics* 2013;93:798-811.
129. Bellen HJ, Tong C, Tsuda H. 100 years of Drosophila research and its impact on vertebrate neuroscience: a history lesson for the future, *Nature Reviews. Neuroscience* 2010;11:514-522.
130. Reiter LT, Potocki L, Chien S et al. A systematic analysis of human disease-associated gene sequences in Drosophila melanogaster, *Genome Research* 2001;11:1114-1125.
131. Brand AH, Perrimon N. Targeted gene expression as a means of altering cell fates and generating dominant phenotypes, *Development* 1993;118:401-415.
132. Dietzl G, Chen D, Schnorrer F et al. A genome-wide transgenic RNAi library for conditional gene inactivation in Drosophila, *Nature* 2007;448:151-156.
133. Wu Y, Bolduc FV, Bell K et al. A Drosophila model for Angelman syndrome, *Proceedings of the National Academy of Sciences of the United States of America* 2008;105:12399-12404.
134. Lu Y, Wang F, Li Y et al. The Drosophila homologue of the Angelman syndrome ubiquitin ligase regulates the formation of terminal dendritic branches, *Human Molecular Genetics* 2009;18:454-462.
135. Kramer JM, Kochinke K, Oortveld MA et al. Epigenetic regulation of learning and memory by Drosophila EHMT/G9a, *PLoS Biology* 2011;9:e1000569.
136. Lucena J, Pezzi S, Aso E et al. Essential role of the N-terminal region of TFII-I in viability and behavior, *BMC Med Genet* 2010;11:61.
137. Jiang YH, Armstrong D, Albrecht U et al. Mutation of the Angelman ubiquitin ligase in mice causes increased cytoplasmic p53 and deficits of contextual learning and long-term potentiation, *Neuron* 1998;21:799-811.
138. Heck DH, Zhao Y, Roy S et al. Analysis of cerebellar function in Ube3a-deficient mice reveals novel genotype-specific behaviors, *Human Molecular Genetics* 2008;17:2181-2189.
139. Gabriel JM, Merchant M, Ohta T et al. A transgene insertion creating a heritable chromosome deletion mouse model of Prader-Willi and angelman syndromes, *Proceedings of the National Academy of Sciences of the United States of America* 1999;96:9258-9263.
140. Yang T, Adamson TE, Resnick JL et al. A mouse model for Prader-Willi syndrome imprinting-centre mutations, *Nature Genetics* 1998;19:25-31.
141. Dubose AJ, Smith EY, Yang TP et al. A new deletion refines the boundaries of the murine Prader-Willi syndrome imprinting center, *Human Molecular Genetics* 2011;20:3461-3466.

142. Schaller F, Watrin F, Sturny R et al. A single postnatal injection of oxytocin rescues the lethal feeding behaviour in mouse newborns deficient for the imprinted *Magel2* gene, *Human Molecular Genetics* 2010;19:4895-4905.
143. Ding F, Li HH, Zhang S et al. SnoRNA *Snord116* (*Pwcr1/MBII-85*) deletion causes growth deficiency and hyperphagia in mice, *PLoS ONE* 2008;3:e1709.
144. Muscatelli F, Abrous DN, Massacrier A et al. Disruption of the mouse *Necdin* gene results in hypothalamic and behavioral alterations reminiscent of the human Prader-Willi syndrome, *Human Molecular Genetics* 2000;9:3101-3110.
145. Nakatani J, Tamada K, Hatanaka F et al. Abnormal behavior in a chromosome-engineered mouse model for human 15q11-13 duplication seen in autism, *Cell* 2009;137:1235-1246.
146. Smith SE, Zhou YD, Zhang G et al. Increased gene dosage of *Ube3a* results in autism traits and decreased glutamate synaptic transmission in mice, *Sci Transl Med* 2011;3:103ra197.
147. Bozdagi O, Sakurai T, Papapetrou D et al. Haploinsufficiency of the autism-associated *Shank3* gene leads to deficits in synaptic function, social interaction, and social communication, *Mol Autism* 2010;1:15.
148. Wang X, McCoy PA, Rodriguiz RM et al. Synaptic dysfunction and abnormal behaviors in mice lacking major isoforms of *Shank3*, *Human Molecular Genetics* 2011;20:3093-3108.
149. Peca J, Feliciano C, Ting JT et al. *Shank3* mutant mice display autistic-like behaviours and striatal dysfunction, *Nature* 2011;472:437-442.
150. Williams SR, Aldred MA, Der Kaloustian VM et al. Haploinsufficiency of *HDAC4* causes brachydactyly mental retardation syndrome, with brachydactyly type E, developmental delays, and behavioral problems, *American Journal of Human Genetics* 2010;87:219-228.
151. Balemans MC, Ansar M, Oudakker AR et al. Reduced Euchromatin histone methyltransferase 1 causes developmental delay, hypotonia, and cranial abnormalities associated with increased bone gene expression in Kleeftstra syndrome mice, *Developmental Biology* 2014;386:395-407.
152. Adams CE, Yonchek JC, Schulz KM et al. Reduced *Chrna7* expression in mice is associated with decreases in hippocampal markers of inhibitory function: implications for neuropsychiatric diseases, *Neuroscience* 2012;207:274-282.



## Figure legends

**Figure 1.** Models to explain causality of disease due to rare CNVs. **(A)** Single gene model: A core gene is responsible for a majority of the disease phenotypes as observed in SMS. **(B)** Contiguous gene model: Individual genes within the CNV region contribute to a specific phenotype and as a result individuals with the deletion manifest multiple unrelated features as in WBS. **(C)** *Cis* and *trans* interaction model: Dosage alteration of two or more functionally relevant genes within (*cis*) or outside the CNV region (*trans*) leads to the disease phenotype. **(D)** Parent-of-origin model: Disease phenotypes due to disruption of the paternally or the maternally derived allele/genes as in PWS and AS, respectively.

**Table 1. A summary of clinical features and functional studies of rare CNV disorders**

| Genomic disorder                                          | Clinical features                                                                                              | Candidate gene(s)        | Animal Model                                                        | Phenotypes in animal models                                                                                                                                                            | Reference |
|-----------------------------------------------------------|----------------------------------------------------------------------------------------------------------------|--------------------------|---------------------------------------------------------------------|----------------------------------------------------------------------------------------------------------------------------------------------------------------------------------------|-----------|
| Williams-Beuren Syndrome (7q11.23 deletion); OMIM: 194050 | Characteristic facial features, cardiac malformation, cognitive deficits, behavioral defects, hypersociability | Contiguous gene syndrome | Mouse (complete Deletion)                                           | Mice exhibit reduced body weight, craniofacial and brain abnormalities, increased sociability, cognitive deficits, mild cardiovascular phenotype, reduced brain size and motor defects | [117]     |
|                                                           |                                                                                                                |                          | Mouse (proximal deletion, lacking <i>Gtf2i</i> to <i>Limk1</i> )    | Increased sociability and acoustic startle response and retarded growth                                                                                                                | [112]     |
|                                                           |                                                                                                                |                          | Mouse (distal deletion, lacking <i>Limk1</i> to <i>Fkbp6</i> )      | Cognitive deficits, shortened skull and reduced brain size                                                                                                                             | [112]     |
|                                                           |                                                                                                                |                          | Mouse (proximal plus distal to achieve complete deletion)           | Growth retardation, shortened skull, smaller brains and impaired motor skills                                                                                                          | [112]     |
|                                                           |                                                                                                                |                          | Mouse ( <i>Wstf</i> <sup>-/-</sup> )                                | Neonatal lethality and cardiovascular abnormalities                                                                                                                                    | [113]     |
|                                                           |                                                                                                                |                          | Mouse ( <i>Eif4h</i> knockout)                                      | Growth retardation, reduced brain size, altered brain morphology, impaired memory and behavioral defects                                                                               | [114]     |
|                                                           |                                                                                                                |                          | Mouse (partial deletion lacking <i>Cyln2</i> )                      | Mild growth defects, brain abnormalities, hippocampal dysfunction and motor defects                                                                                                    | [115]     |
|                                                           |                                                                                                                |                          | Mouse ( <i>Eln</i> knockout)                                        | Die of obstructive arterial disease mimicking atherosclerosis                                                                                                                          | [116]     |
|                                                           |                                                                                                                |                          | Mouse ( <i>Gtf2i</i> <sup>-/-</sup> , <i>Gtf2i</i> <sup>+/-</sup> ) | Craniofacial and neurobehavioral abnormalities. <i>Gtf2i</i> <sup>-/-</sup> mice show embryonic lethality and infertility                                                              | [136]     |
| 7q11.23 duplication; OMIM: 609757                         | Mild craniofacial anomalies, speech delay, congenital abnormalities, ID, autism and schizophrenia              | Contiguous gene syndrome | Mouse (complete duplication)                                        | Not available yet                                                                                                                                                                      |           |
|                                                           |                                                                                                                |                          | Mouse ( <i>Gtf2i</i> duplication)                                   | Increased maternal-separation anxiety                                                                                                                                                  | [118]     |



|                                                                   |                                                                                                              |                          |                                                                                                                              |                                                                                                                                                                                                     |            |
|-------------------------------------------------------------------|--------------------------------------------------------------------------------------------------------------|--------------------------|------------------------------------------------------------------------------------------------------------------------------|-----------------------------------------------------------------------------------------------------------------------------------------------------------------------------------------------------|------------|
| Smith-Magenis Syndrome (17p11.2 deletion); OMIM: 182290           | ID, dysmorphic features, congenital anomalies, sleep disturbance, self-injurious and aggressive behavior     | <i>RAI1</i>              | Mouse (complete deletion)                                                                                                    | Mice exhibit obesity, craniofacial abnormalities, seizures and abnormal behavior                                                                                                                    | [105]      |
|                                                                   |                                                                                                              |                          | Mouse ( <i>Rai1</i> +/-, <i>Rai1</i> -/-)                                                                                    | <i>Rai1</i> +/- mice display obesity and craniofacial features. <i>Rai1</i> -/- show embryonic lethality and postnatal growth retardation                                                           | [104]      |
| Potocki-Lupski Syndrome (17p11.2 duplication); OMIM: 610883       | DD, hypotonia, failure to thrive, ID, cardiovascular malformations, behavioral abnormalities including ASD   | <i>RAI1</i>              | Mouse (complete duplication)                                                                                                 | Reduced weight, hyperactivity, abnormal social behaviors                                                                                                                                            | [105, 111] |
|                                                                   |                                                                                                              |                          | Mouse (overexpression of <i>Rai1</i> )                                                                                       | Growth retardation, increased locomotor activity, and abnormal anxiety-related behavior                                                                                                             | [109, 110] |
| Angelman Syndrome (15q11-q13 maternal deletion); OMIM: 105830     | Intellectual disability, ataxia, developmental delay, behavioral defects and speech and language impairments | <i>UBE3A</i>             | Mouse ( <i>Ube3A</i> knockout)                                                                                               | <i>Ube3A</i> maternal-deficient mice display reduced brain weight, ataxia, motor defects and behavioral defects                                                                                     | [137, 138] |
|                                                                   |                                                                                                              |                          | <i>Drosophila</i>                                                                                                            | Lack of <i>Ube3A</i> in <i>Drosophila</i> leads to motor defects, abnormal circadian rhythms, long-term memory defects and abnormalities in dendritic arborization in the peripheral nervous system | [133, 134] |
| Prader-Willi Syndrome (15q11-q13 paternal deletion); OMIM: 176270 | Facial dysmorphism, hypogonadism, short stature, obesity, ID, and behavioral problems                        | Contiguous gene syndrome | Mouse ( <i>TgPWS</i> : transgene inserted into chromosome 7C)                                                                | Paternal transmission results in a lack of paternal gene expression of the PWS interval that leads to early postnatal lethality                                                                     | [139]      |
|                                                                   |                                                                                                              |                          | Mouse (PWS-IC +/- lacking the 42 kb PWS imprinting center including <i>Snrpn</i> , <i>Znf127</i> , <i>Ndn</i> , <i>Ipw</i> ) | Failure to thrive and early postnatal lethality                                                                                                                                                     | [140]      |
|                                                                   |                                                                                                              |                          | Mouse (PWS-IC lacking a smaller 6 kb PWS imprinting center including <i>Snrpn</i> )                                          | Mice with paternal inheritance of this deletion exhibit complete loss of paternal gene expression and neonatal lethality                                                                            | [141]      |

|                                     |                                                                                                  |  |                                      |                                                                                                                                                                                                                   |       |
|-------------------------------------|--------------------------------------------------------------------------------------------------|--|--------------------------------------|-------------------------------------------------------------------------------------------------------------------------------------------------------------------------------------------------------------------|-------|
|                                     |                                                                                                  |  | Mouse ( <i>Magel2</i> knockout)      | Failure to survive to adulthood                                                                                                                                                                                   | [142] |
|                                     |                                                                                                  |  | Mouse ( <i>Snord116</i> knockout)    | Early-onset postnatal growth deficiency, normal fertility, increased anxiety, defects in motor learning                                                                                                           | [143] |
|                                     |                                                                                                  |  | Mouse ( <i>Ndn</i> knockout)         | <i>Ndn</i> knockout mice survive and display increased skin scraping and improved spatial learning and memory                                                                                                     | [144] |
| 15q11-q13 duplication; OMIM: 608636 | Autism, intellectual disability, ataxia, seizures, developmental delays, and behavioral problems |  | Mouse (complete duplication)         | The mice with paternally inherited duplication exhibited autistic behaviors such as poor social interaction and abnormal ultrasonic vocalizations, whereas the maternally inherited duplication mice were WT-like | [145] |
|                                     |                                                                                                  |  | Mouse ( <i>Ube3A</i> overexpression) | Autism like phenotypes and decreased glutamate synaptic transmission, irrespective of the paternal origin. However the <i>Ube3A</i> transgene was not imprinted                                                   | [146] |
| 16p11.2 deletion; OMIM: 611913      | ID, ASD, obesity, DD, speech delays                                                              |  | Mouse (complete deletion)            | 50% mice die postnatally and the survivors display abnormalities in brain architecture, increased brain volume and behavioral defects                                                                             | [119] |
|                                     |                                                                                                  |  | Mouse (complete deletion)            | Defects in basal ganglia circuitry, synaptic defects, elevated numbers of medium spiny neurons and behavioral defects including hyperactivity and cognitive deficits                                              | [120] |
|                                     |                                                                                                  |  | Zebrafish                            | Suppression of <i>KCTD13</i> mimics the macrocephaly phenotype seen in patients.                                                                                                                                  | [125] |
| 16p11.2 duplication; OMIM: 614671   | ID, ASD, schizophrenia                                                                           |  | Mouse (complete duplication)         | 16p11.2 duplication mice display milder phenotypes as compared to the deletion mice. These mice exhibit reduced brain volume and mild behavioral defects.                                                         | [119] |

|                                                                         |                                                                                                                                          |               |                                                                                   |                                                                                                                                                                                                                                             |                  |
|-------------------------------------------------------------------------|------------------------------------------------------------------------------------------------------------------------------------------|---------------|-----------------------------------------------------------------------------------|---------------------------------------------------------------------------------------------------------------------------------------------------------------------------------------------------------------------------------------------|------------------|
|                                                                         |                                                                                                                                          |               | Zebrafish                                                                         | Overexpression of <i>KCTD13</i> mimics the microcephaly phenotype seen in patients.                                                                                                                                                         | [125]            |
| DGS/VCFS (22q11.2 deletion); OMIM: 188400; OMIM: 192430                 | Craniofacial abnormalities, cardiovascular defects, ID, ASD, and schizophrenia                                                           | <i>TBX1</i>   | Mouse (Df/+ carrying deletion of 22 genes within 22q11.2)                         | Df1/+ mice exhibit cardiovascular defects, learning and memory deficits and abnormal behavior, as measured by prepulse inhibition of the startle response                                                                                   | [91, 94]         |
|                                                                         |                                                                                                                                          |               | Mouse (overlapping deletions within the 22q11.2 region and <i>Tbx1</i> knockouts) | Overlapping deletions in mouse models narrowed down the intervals responsible for PPI impairments to <i>Tbx1</i> and <i>Gnb1l</i> and for heart defect to <i>Tbx1</i> . These were further validated by targeted knock-out of <i>Tbx1</i> . | [88, 89, 91, 94] |
| Phelan-McDermid syndrome; (22q13 deletion); OMIM: 606232                | ID, DD, delayed or absent speech, and autistic features                                                                                  | <i>SHANK3</i> | Mouse ( <i>Shank3</i> +/-)                                                        | Defects in synaptic function and plasticity and reduced social interactions.                                                                                                                                                                | [147]            |
|                                                                         |                                                                                                                                          |               | Mouse ( <i>Shank3</i> -/-)                                                        | Abnormal social behavior, repetitive behavior, defects in learning and memory, morphological alterations in dendritic spines, and impaired long term potentiation                                                                           | [148, 149]       |
| Brachydactyly Mental Retardation Syndrome (2q37 deletion); OMIM: 600430 | ID, DD, obesity, craniofacial and skeletal defects, behavioral defects, sleep disturbance and ASD                                        | <i>HDAC4</i>  | Mouse ( <i>Hdac4</i> -/-)                                                         | Severe bone malformations as indicated by chondrocyte hypertrophy and premature bone ossification                                                                                                                                           | [150]            |
| Kleefstra Syndrome; (9q34 del); OMIM: 610253                            | Severe intellectual disability, hypotonia, brachycephaly, craniofacial abnormalities, conotruncal heart defects, and behavioral problems | <i>EHMT1</i>  | Mouse ( <i>Ehmt</i> +/-)                                                          | Autistic like features, delayed postnatal development, hypotonia, craniofacial dysmorphism and defects in learning and synaptic dysfunction                                                                                                 | [151]            |
|                                                                         |                                                                                                                                          |               | <i>Drosophila</i>                                                                 | <i>EHMT</i> deficient flies show abnormal dendritic arbors, defects in larval locomotor and non-associative learning and courtship memory                                                                                                   | [135]            |

|                                   |                                                                                              |                                 |                               |                                                                                                                                                                                         |       |
|-----------------------------------|----------------------------------------------------------------------------------------------|---------------------------------|-------------------------------|-----------------------------------------------------------------------------------------------------------------------------------------------------------------------------------------|-------|
| 15q13.3 deletion;<br>OMIM: 612001 | Idiopathic generalized epilepsy, ID, ASD and schizophrenia                                   | <i>OTUD7</i> ,<br><i>CHRNA7</i> | Mouse (complete deletion)     | Susceptibility to seizures, impaired spatial reference memory, aggression, increased body weight and auditory processing defects                                                        | [121] |
|                                   |                                                                                              |                                 | Mouse<br>( <i>Chrna7</i> +/-) | Impaired hippocampal inhibitory circuit function                                                                                                                                        | [152] |
| 8q24 deletion;<br>OMIM: 615583    | Craniofacial anomalies, DD, ID, coloboma, cardiac defects, psychomotor delay and convulsions | Contiguous gene syndrome        | Zebrafish                     | Suppression of <i>SCRIB</i> and <i>PUF60</i> leads to short stature, microcephaly and craniofacial defects. Also, suppression of <i>SCRIB</i> leads to coloboma and renal abnormalities | [128] |

ID, intellectual disability; DD, developmental delay; ASD, autism spectrum disorders

Figure 1

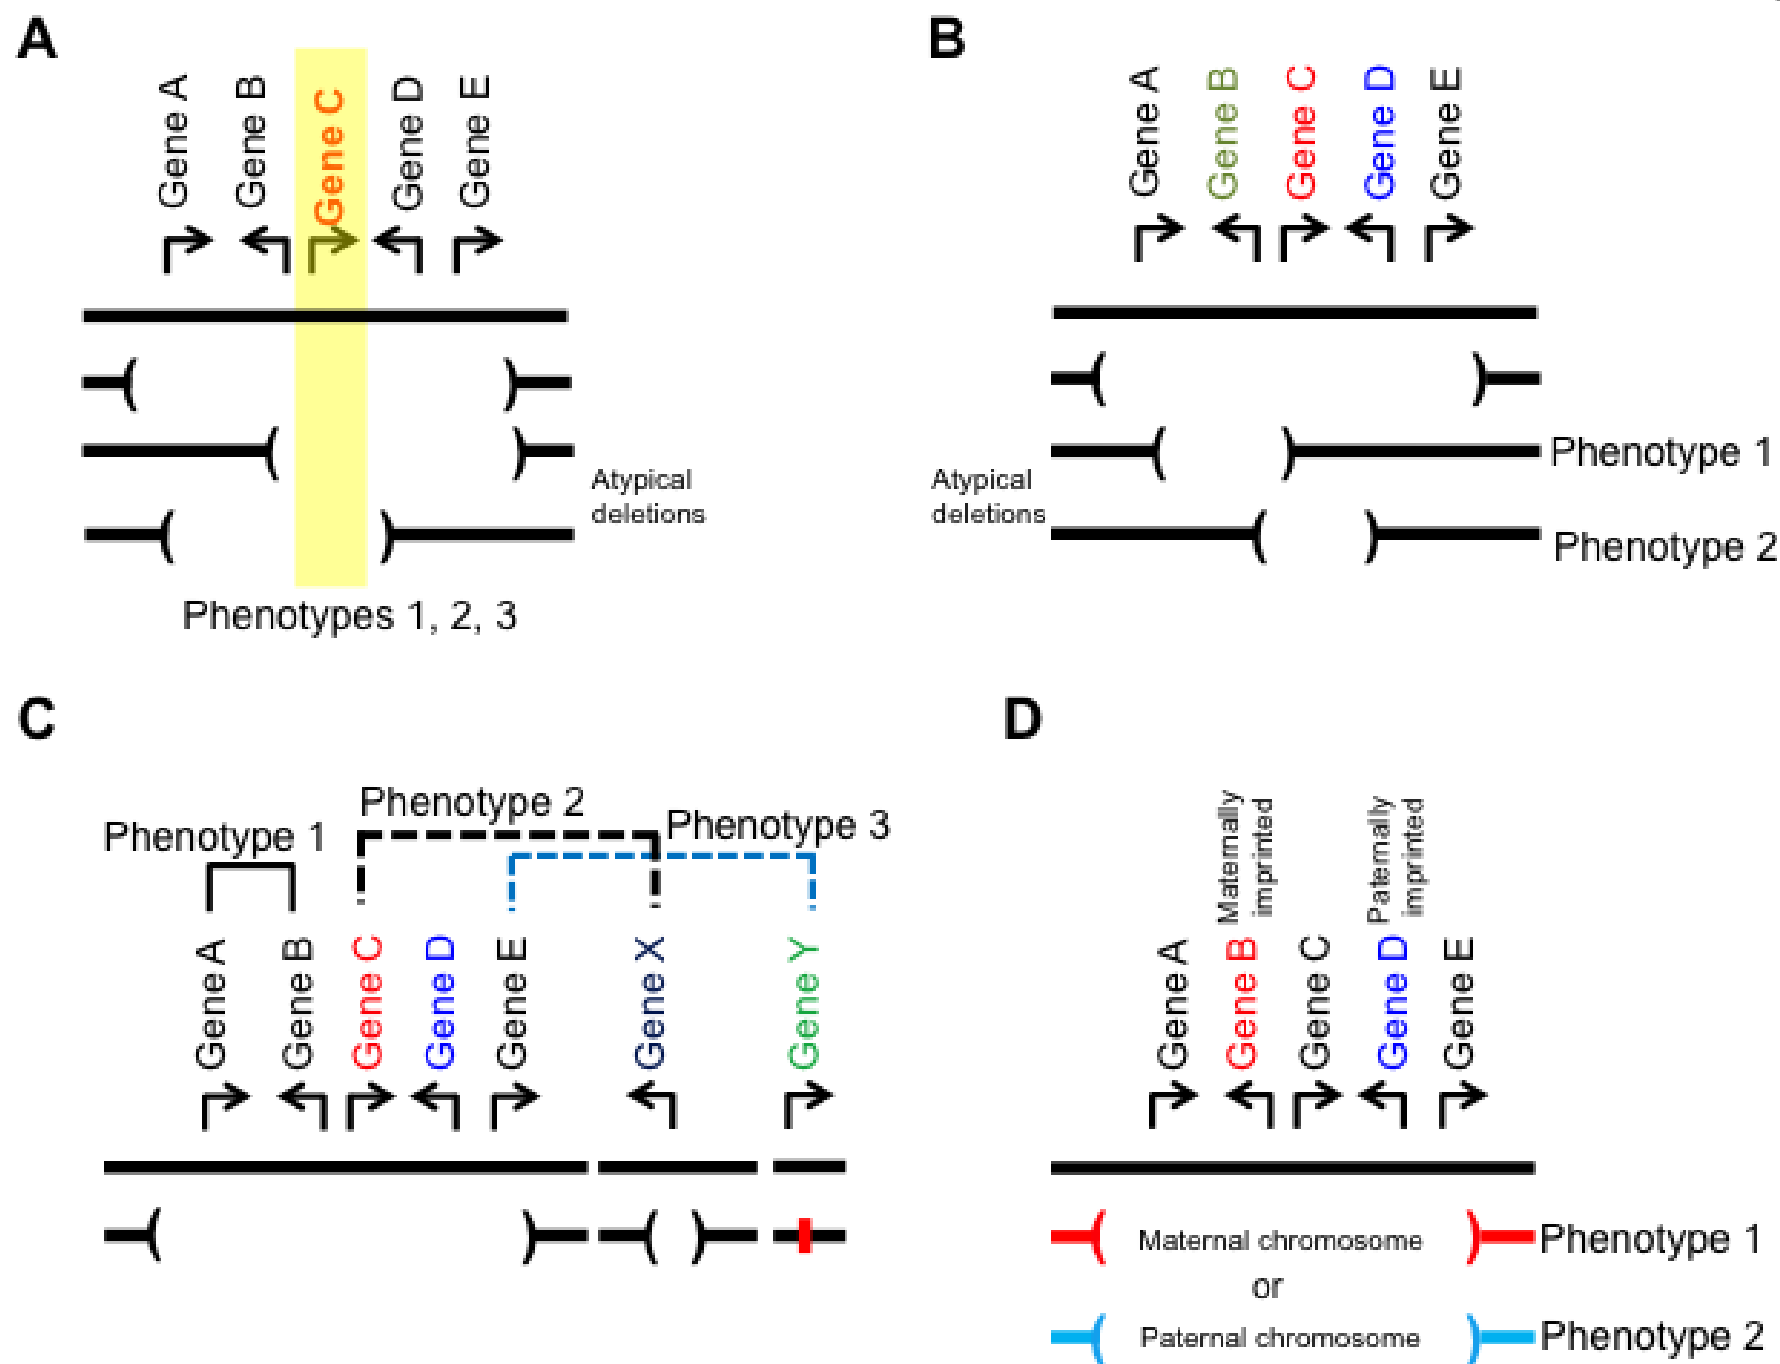

Source: http://biorxiv.org/content/10.1101/011510v1.full.pdf
